# Supplementary material for: CRISPR-based gene drives generate super-Mendelian inheritance in the disease vector Culex quinquefasciatus
Source: Nat Commun. 2023 Nov 20;14:7561. doi: 10.1038/s41467-023-41834-1 (PMC10662442; doi:10.1038/s41467-023-41834-1)
Supplement: Supplementary file 5 — Supplementary Data 1 [file 41467_2023_41834_MOESM5_ESM.xlsx]

## Sheet: Sheet1
Injection											G0 Pool Crosses						Counting
Injection condition									G0 crossed to wt							G1 Offspring Phenotype scoring
Experiment	Injected mix	Line	Date	Marker	Injected Eggs	Conc.	Adults	Survival	Sex	Number	Code	Injected G0 #	X Line	X Oppo.Sex #	Setup date	1st BF date (3 days in row)	1st egg induction date	Rafts number	Counting Date	DsRed+; GFP-	DsRed+;GFP+
CC injection	pVMG0295	Cas9 Line	2021-02-26	Hr5IE1-GFP	336	200ng/ul	10	0.0298	Male	8	MP1	8	wt	40	2021-03-15	2021-03-20	2021-03-25	22	2021-04-01	692	1
									Female	2	FP1	2	wt	6	2021-03-15	2021-03-20	2021-03-25	0	N/A	N/A	N/A
