# Supplementary material for: CRISPR-based gene drives generate super-Mendelian inheritance in the disease vector Culex quinquefasciatus
Source: Nat Commun. 2023 Nov 20;14:7561. doi: 10.1038/s41467-023-41834-1 (PMC10662442; doi:10.1038/s41467-023-41834-1)
Supplement: Supplementary file 6 — Supplementary Data 2 [file 41467_2023_41834_MOESM6_ESM.xlsx]

## Sheet: Sheet1
	Cross	Line	Phenotype	Count		Egg Raft #	Female				Total	Male				Total	Calculation
	male	G1 positive transformant	DsRed+; GFP+	1			w+					w+
	female	WT-CA	-/-	~20			DsRed+		DsRed-			DsRed+		DsRed-
							GFP+	GFP-	GFP+	GFP-		GFP+	GFP-	GFP+	GFP-		DsRed+/GFP+	WT	GFP+only	DsRed+only	Inheritance
						1	0	5	1	12	18	38	0	8	1	47	38	13	9	5	0.7231
