# Supplementary material for: CRISPR-based gene drives generate super-Mendelian inheritance in the disease vector Culex quinquefasciatus
Source: Nat Commun. 2023 Nov 20;14:7561. doi: 10.1038/s41467-023-41834-1 (PMC10662442; doi:10.1038/s41467-023-41834-1)
Supplement: Supplementary file 7 — Supplementary Data 3 [file 41467_2023_41834_MOESM7_ESM.xlsx]

## Sheet: 1. Fig. 2c - Male Copying Data
	G0 Cross					G1 (Single-Pair) Cross				G2 Phenotypical Scoring										G2 Calculations
	F0 Cage	Female	Male	Date		Cross number	Male	Female		Cross number	GFP+ (donor & copy)	GFP-, w- (indel)	GFP-, w+ (WT)	Total		DsRed+	DsRed-	Total		Cross number	Inheritance (%)		Comments
																					GFP+	DsRed
	1	WT-CA (x10)	CC-Cas9 (x10)	5/12-13/2021		1	CC-Cas9	WT-CA		1	8	-	15	23		9	14	23		1	0.347826	0.391304
						2	CC-Cas9	WT-CA		2	34	-	34	68		41	27	68		2	0.5	0.602941
						3	CC-Cas9	WT-CA		3	15	-	21	36		21	15	36		3	0.416667	0.583333
						4	CC-Cas9	WT-CA		4	52	-	40	92		48	44	92		4	0.565217	0.521739
						5	CC-Cas9	WT-CA		5	21	-	10	31		18	13	31		5	0.677419	0.580645
						6	CC-Cas9	WT-CA		6	5	-	5	10		7	3	10		6	0.5	0.7
						7	CC-Cas9	WT-CA		7	28	-	30	58		27	31	58		7	0.482759	0.465517
										Sums:	163	-	155	318		171	147	318			0.498555	0.549354	Arithmetic Mean
																					0.104972	0.100391	Standard Deviation
																					0.512	0.537	Mean Est. - Binomial Model
																					45.2 – 57.1%	47.7 – 59.5%	95% Confidence Interval (CI)
																					0.69	0.91	p-value

## Sheet: 2. Fig. 2d - Female Copying Dat
	G0 Cross					G1 (Single-Pair) Cross				G2 Phenotypical Scoring										F2 Calculations
	F0 Cage	Female	Male	Date		Cross number	Male	Female Phenotype		Cross number	GFP+ (donor & copy)	GFP-, w- (indel)	GFP-, w+ (WT)	Total		DsRed+	DsRed-	Total		Cross number	Inheritance (%)		Comments
																					GFP+	DsRed
	1	CC-Cas9 (10X)	WT-CA line (10x)	7/3/2021-7/10/2021		1	WT-CA	CC-Cas9		1	11	2	6	19		5	14	19		1	0.578947	0.263158
						2	WT-CA	CC-Cas9		2	11	3	12	26		16	10	26		2	0.423077	0.615385
						3	WT-CA	CC-Cas9		3	13	1	9	23		8	15	23		3	0.565217	0.347826
						4	WT-CA	CC-Cas9		4	6	1	7	14		7	7	14		4	0.428571	0.5
						5	WT-CA	CC-Cas9		5	48	5	20	73		33	40	73		5	0.657534	0.452055
						6	WT-CA	CC-Cas9		6	34	1	36	71		34	37	71		6	0.478873	0.478873
						7	WT-CA	CC-Cas9		7	47	1	26	74		36	38	74		7	0.635135	0.486486
						8	WT-CA	CC-Cas9		8	66	6	36	108		61	47	108		8	0.611111	0.564815
						9	WT-CA	CC-Cas9		9	47	3	47	97		60	37	97		9	0.484536	0.618557
						10	WT-CA	CC-Cas9		10	3	0	0	3		0	3	3		10	-	-	Low total G2 offspring (<5)
						11	WT-CA	CC-Cas9		11	32	2	16	50		26	24	50		11	0.64	0.52
						12	WT-CA	CC-Cas9		12	27	5	21	53		24	29	53		12	0.509434	0.45283
						13	WT-CA	CC-Cas9		13	23	3	11	37		16	21	37		13	0.621622	0.432432
						14	WT-CA	CC-Cas9		14	28	4	34	66		40	26	66		14	0.424242	0.606061
						15	WT-CA	CC-Cas9		15	32	2	23	57		29	28	57		15	0.561404	0.508772
						16	WT-CA	CC-Cas9		16	43	0	35	78		37	41	78		16	0.551282	0.474359
						17	WT-CA	CC-Cas9		17	23	5	19	47		22	25	47		17	0.489362	0.468085
						18	WT-CA	CC-Cas9		18	44	6	32	82		40	42	82		18	0.536585	0.487805
						19	WT-CA	CC-Cas9		19	39	5	37	81		43	38	81		19	0.481481	0.530864
						20	WT-CA	CC-Cas9		20	28	1	16	45		20	25	45		20	0.622222	0.444444
										Sums:	605	56	443	1104		557	547	1104			0.540094	0.499425	Arithmetic Mean
																					0.0788893	0.0694638	Standard Deviation
																					0.548	0.502	Mean Est. - Binomial Model
																					51.6 - 57.9%	46.9 - 53.5%	95% Confidence Interval (CI)
																					0.003	0.91	p-value

## Sheet: 3. Fig. 4c,d - Marked chromosom
	G0 Cross					G1 Cross					G2 Raft Phenotypical Scoring												G2 Calculations
											F2 Raft	F1 Cage	Donor	Receiver			Total		DsRed tracking		Total
	F0 Cage	Female	Male	Date		F1 Cage	Female	Male	Date				GFP+, w+ (donor)	GFP+, w- (copy)	Non GFP, w- (NHEJ/WT)	Non GFP, w+ (should be 0)			DsRed+	DsRed-			F1 cross	Inheritance (%)		Homing Efficiency	Donor/ Receiver	Comments
																								GFP+	DsRed
	1	w6CC (21x)	Cas9, w- (30x)	2021-09-13		1	GFP, w-, DsRed (30x)	w4-/w4- (30x)	2021-10-03		1	1	39	7	28	0	74		34	40	74		1	0.621622	0.459459	0.2	1.11429
	2	w6CC (35x)	Cas9, w- (31x)	2021-09-28		2	GFP, w-, DsRed (30x)	w4-/w4- (30x)	2021-10-18		2	1	12	0	8	0	20		8	12	20		2	0.6	0.4	0	1.5
											3	1	34	1	23	0	58		21	37	58		3	0.603448	0.362069	0.0416667	1.41667
											4	1	23	0	15	0	38		14	24	38		4	0.605263	0.368421	0	1.53333
											5	1	13	3	10	0	26		13	13	26		5	0.615385	0.5	0.230769	1
											6	1	26	0	29	0	55		29	26	55		6	0.472727	0.527273	0	0.896552
											7	1	19	1	14	0	34		19	15	34		7	0.588235	0.558824	0.0666667	1.26667
											8	2	10	0	12	0	22		11	11	22		8	0.454545	0.5	0	0.833333
											9	2	3	0	5	0	8		6	2	8		9	0.375	0.75	0	0.6	Low total G2 offspring (<10)
											10	2	34	0	33	0	67		35	32	67		10	0.507463	0.522388	0	1.0303
											11	2	12	0	9	0	21		9	12	21		11	0.571429	0.428571	0	1.33333
											12	2	26	0	18	0	44		22	22	44		12	0.590909	0.5	0	1.44444
											13	2	7	0	6	0	13		7	6	13		13	0.538462	0.538462	0	1.16667	Low total G2 offspring (<20)
											14	2	16	0	19	0	35		14	21	35		14	0.457143	0.4	0	0.842105
											15	2	33	0	20	0	53		24	29	53		15	0.622642	0.45283	0	1.65
											16	2	11	0	10	0	21		14	7	21		16	0.52381	0.666667	0	1.1
											17	2	34	0	24	0	58		28	30	58		17	0.586207	0.482759	0	1.41667
											Sums:		352	12	283	0	647		308	339	647		Avg.	0.549076	0.49516	0.0317119	1.18496	Arithmetic Mean
																							Std. Dev.	0.072862	0.10052	0.0717369	0.293417	Standard Deviation
																								0.563	0.476	0.0407		Mean Est. - Binomial Model
																								52.3 – 60.2%	43.6 – 51.6%	2.2 – 7.3%		95% Confidence Interval (CI)
																								0.001	0.22	<0.0001		p-value
