# Supplementary material for: CRISPR-based gene drives generate super-Mendelian inheritance in the disease vector Culex quinquefasciatus
Source: Nat Commun. 2023 Nov 20;14:7561. doi: 10.1038/s41467-023-41834-1 (PMC10662442; doi:10.1038/s41467-023-41834-1)
Supplement: Supplementary file 8 — Supplementary Data 4 [file 41467_2023_41834_MOESM8_ESM.xlsx]

## Sheet: Fig. 4b - kmo Homing Data
	G0 Cross				G1 Cross						G2 Phenotypical Scoring							G2 Calculations
												Vasa-Cas9		No Vasa-Cas9		Total		F1 cross	gRNA Inheritance %	Vasa-Cas9 %	Comments
	G0 Cage	Female	Male		Cross Scheme	G1 Cross	G0 Cage	Female	Male			Vasa-Cas9 only	Vasa-Cas9 + 2069 (gRNA)	WT	2069 (gRNA) only
	1	gRNA	Cas9		MF	1	1	Cas9-gRNA	WT		1	19	24	20	26	89		1	0.561798	0.483146
	2	Cas9	gRNA			2	1	Cas9-gRNA	WT		2	15	16	20	25	76		2	0.539474	0.407895
						3	1	Cas9-gRNA	WT		3	117	119	123	136	495		3	0.515152	0.476768
						4	1	Cas9-gRNA	WT		4	13	23	17	21	74		4	0.594595	0.486486
						5	1	Cas9-gRNA	WT		5	33	41	29	43	146		5	0.575342	0.506849
						6	1	Cas9-gRNA	WT		6	9	10	10	8	37		6	0.486486	0.513514
						7	1	Cas9-gRNA	WT		7	27	26	20	27	100		7	0.53	0.53
						8	1	Cas9-gRNA	WT		8	3	10	13	11	37		8	0.567568	0.351351
						9	1	Cas9-gRNA	WT		9	19	12	13	21	65		9	0.507692	0.476923
						10	1	Cas9-gRNA	WT		10	5	9	6	5	25		10	0.56	0.56
						11	1	Cas9-gRNA	WT		11	20	41	26	25	112		11	0.589286	0.544643
						12	1	Cas9-gRNA	WT		12	27	31	21	28	107		12	0.551402	0.542056
						13	1	Cas9-gRNA	WT		13	13	14	13	22	62		13	0.580645	0.435484
						14	1	Cas9-gRNA	WT		14	8	15	3	13	39		14	0.717949	0.589744
						15	1	Cas9-gRNA	WT		15	22	22	8	17	69		15	0.565217	0.637681
					MM	16	1	WT	Cas9-gRNA		16	25	30	20	38	113		16	0.60177	0.486726
						17	1	WT	Cas9-gRNA		17	7	5	3	4	19		17	0.473684	0.631579	Low total G2 offspring (<20)
						18	1	WT	Cas9-gRNA		18	17	24	14	22	77		18	0.597403	0.532468
						19	1	WT	Cas9-gRNA		19	4	19	13	20	56		19	0.696429	0.410714
					FF	20	2	Cas9-gRNA	WT		20	37	42	40	58	177		20	0.564972	0.446328
						21	2	Cas9-gRNA	WT		21	19	20	18	19	76		21	0.513158	0.513158
						22	2	Cas9-gRNA	WT		22	53	70	50	53	226		22	0.544248	0.544248
						23	2	Cas9-gRNA	WT		23	51	70	53	47	221		23	0.529412	0.547511
						24	2	Cas9-gRNA	WT		24	59	68	42	62	231		24	0.562771	0.549784
						25	2	Cas9-gRNA	WT		25	34	37	34	31	136		25	0.5	0.522059
						26	2	Cas9-gRNA	WT		26	53	53	50	58	214		26	0.518692	0.495327
						27	2	Cas9-gRNA	WT		27	44	65	46	59	214		27	0.579439	0.509346
						28	2	Cas9-gRNA	WT		28	46	60	48	62	216		28	0.564815	0.490741
						29	2	Cas9-gRNA	WT		29	26	44	35	50	155		29	0.606452	0.451613
					FM	30	2	WT	Cas9-gRNA		30	7	9	2	6	24		30	0.625	0.666667
						31	2	WT	Cas9-gRNA		31	8	10	11	23	52		31	0.634615	0.346154
						32	2	WT	Cas9-gRNA		32	13	19	24	17	73		32	0.493151	0.438356
						33	2	WT	Cas9-gRNA		33	21	42	24	35	122		33	0.631148	0.516393
						34	2	WT	Cas9-gRNA		34	16	19	16	26	77		34	0.584416	0.454545
						35	2	WT	Cas9-gRNA		35	10	15	12	15	52		35	0.576923	0.480769
						36	2	WT	Cas9-gRNA		36	4	10	10	14	38		36	0.631579	0.368421
						37	2	WT	Cas9-gRNA		37	6	10	4	5	25		37	0.6	0.64
											Sums:	910	1154	911	1152	4127
																G1 Crosses #		Cross	gRNA inheritance		Cas9
																			Mean	Std	Mean	Std
																1-15		MF	0.56284	0.0528999	0.502836	0.071545
																16-19		MM	0.592321	0.0913385	0.515372	0.0923222
																20-29		FF	0.548396	0.0332147	0.507011	0.0369364
																30-37		FM	0.597104	0.0476831	0.488913	0.115808
																1-37		all	0.569532	0.0755966	0.502309	0.0755966
																Collapsed by G0
																G1 Crosses #		Cross	gRNA inheritance		Cas9
																			Mean	Std	Mean	Std
																1-19		MF + MM	0.569047	0.0609874	0.505475	0.073684
																20-37		FF + FM	0.570044	0.0462659	0.498968	0.0795632
																Collapsed by G1
																G1 Crosses #		Cross	gRNA inheritance		Cas9
																			Mean	Std	Mean	Std
																1-15, 20-29		MF + FF	0.557062	0.0458068	0.504506	0.0591766
																16-19, 30-37		MM + FM	0.59551	0.061055	0.497733	0.0932874
